# Supplementary material
Source: PubMed Central journal article supplement (PMC2922543)
Supplement: 1005960107_pnas.201005960SI.pdf [file 1005960107_pnas.201005960SI.pdf]

# Supporting Information

Li et al. 10.1073/pnas.1005960107

## SI Materials and Methods

**Cell Culture and Treatment.** MEFs were isolated from *E10.5–E12.5* embryos and cultured in DMEM containing 10% FBS. HCT116 cells were cultured in the same media. For the analysis of mitotic index, the cells were treated with nocodazole (100 nM) for 12 h and fixed and stained with propidium iodide, and then the number of cells with condensed chromosomes was counted.

Lentiviral *Atm* vector was purchased from Open Biosystems and packaged into virions in 293T cells by cotransfection with packaging plasmids. Early passage MEFs were infected and selected with puromycin (5  $\mu$ g/mL). After the selection, the cells were collected for Western blot analysis and used for growth curve analysis and mitotic index assays. The shRNA against *Cdc20*<sup>AAA</sup> (GCGATCCTCGCGCTCTCCGAA) was constructed in pLKO.1 vector.

To knock down *MAD2*, *BUBR1*, and *CENP E*, HCT116 cells were transfected with siRNA duplexes mixed in lipofectamine 2000 (Invitrogen). The ON-TARGETplus SMARTpool siRNAs were purchased from Thermal Scientific. *CENP E* siRNA, whose sequence was reported previously (31), was purchased from Sigma.

To assay for the ability to form colonies in soft agar, 1,000 cells were mixed with 0.5% agarose and seeded onto a bottom layer of agarose (0.75%). After 2- to 3-wk culture, the colonies were stained with crystal violet and counted under a microscope.

The measurement of 8-OHdG was carried out with an ELISA-based assay kit (Cell Biolabs). The manufacturer's instruction was followed to obtain the results.

**Immunostaining and Western Blot Analysis.** For immunostaining, the cells were fixed in 4% paraformaldehyde for 10 min, permeabilized with 0.4% Triton X-100 in PBS for 15 min, blocked with 5% goat serum in PBS, incubated with phospho-p53 (Ser15) and phospho-histone H2A.X (Ser139) (Cell Signaling Technology) overnight at 4 °C, and washed with PBS. The primary antibodies were visualized with fluorochrome-conjugated secondary antibodies (1:500; Jackson ImmunoResearch Laboratories) for 60 min at room temperature. The cells were counterstained with 4',6-diamidino-2-phenylindole (DAPI). The fluorescence image was captured using a Nikon ECLIPSE E800 microscope. The exposure time was set at 100 ms with two-by-two binning for both the mutant and the control cells.

For Western blot analysis, the cells were harvested and lysed in RIPA buffer [50 mM Tris-HCl (pH 7.4), 1% Nonidet P-40, 0.25% sodium deoxycholate, 150 mM NaCl, 1 mM EDTA plus protease inhibitor mixture (Roche)]. A total of 50  $\mu$ g total protein was separated in SDS/PAGE and immunoblotted with antibodies against pS18-p53 and p53 (R&D Systems); p21, *MAD2*, *CENP E*, and *Cdc20* (Santa Cruz Biotechnology); *BUBR1* and *ATM* (Abcam); pS1981 *ATM* (Rockland); and Phospho-Histone H2A.X (Ser139) (Cell Signaling Technology).

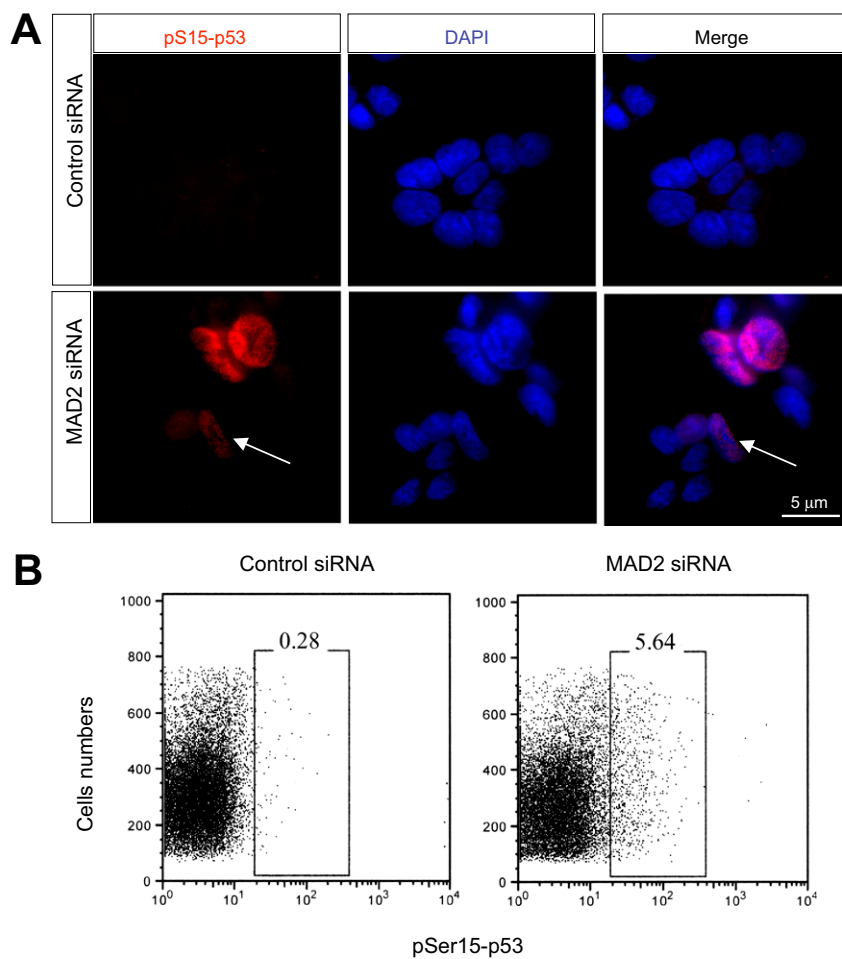

**Fig. S1.** Analysis of p53 activation in HCT116 cells. (A) Immunostaining of Ser15-phosphorylated p53. The arrow indicates a weakly stained cell. (B) FACS sorting of the cells in A.

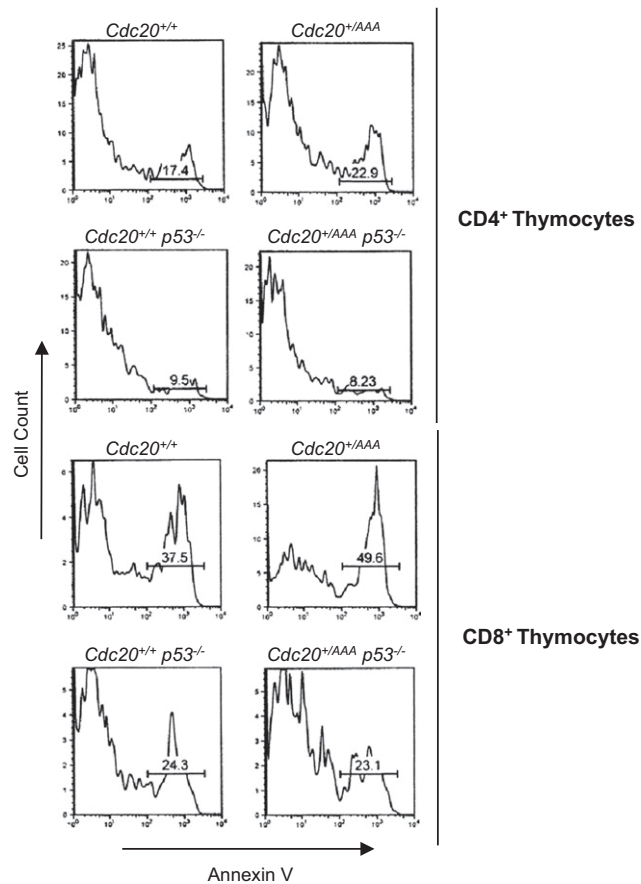

**Fig. S2.** Analysis of apoptosis in thymocytes. Thymocytes were isolated from adult mice, stained for CD4, CD8, and annexin V, and subjected to FACS analysis.

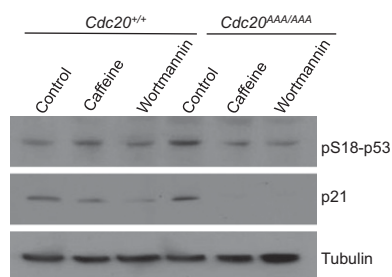

**Fig. S3.** Western blot analysis of wild-type and *Cdc20* mutant MEFs treated with Atm inhibitors.

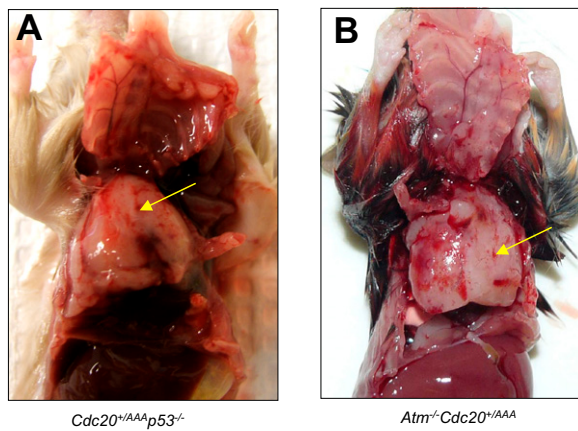

**Fig. S4.** Gross images of gigantic lymphomas developed in a  $Cdc20^{+/AAA}p53^{-/-}$  (A) and an  $Atm^{-/-}Cdc20^{+/AAA}$  mouse (B).

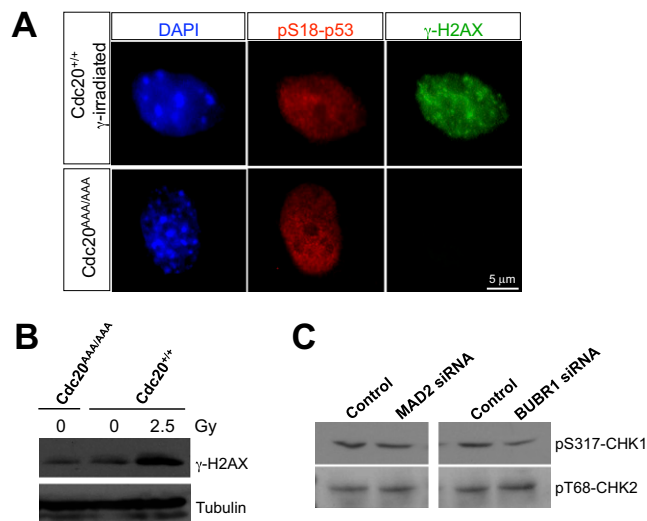

**Fig. S5.** Canonical DNA damage signaling is undetectable in SAC-deficient cells. (A) Immunofluorescent staining of Ser18-phosphorylated p53 and  $\gamma$ -H2AX. The wild-type MEFs were treated with 2.5 Gy  $\gamma$ -irradiation. (B) Western blot analysis of  $\gamma$ -H2AX. (C) Western blot analysis of HCT116 cells in Fig. 1D. For loading control, see Fig. 1E.

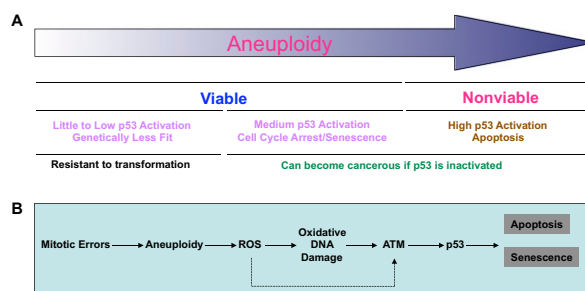

**Fig. S6.** The cellular response to aneuploidy. (A) Potential outcomes of aneuploidy. (B) The aneuploidy checkpoint. The dashed arrow indicates the possibility that ROS may directly activate ATM.
